# Supplementary material for: NMR-based metabolomic studies reveal changes in biochemical profile of urine and plasma from rats fed with sweet potato fiber or sweet potato residue
Source: Royal Society of Chemistry journal article supplement (doi:10.1039/c4ra02421d), 2014-01-01
Supplement: c4ra02421d1.pdf [file c4ra02421d1.pdf]

### Supplementary data

Table S1 Composition and nutrient levels of the basal diet (as-fed basis)

| Items                         | Control | Fiber sources      |                      |
|-------------------------------|---------|--------------------|----------------------|
|                               |         | Sweet potato fiber | Sweet potato residue |
| Ingredients (%)               |         |                    |                      |
| Cornstarch                    | 44.74   | 31.92              | 31.74                |
| Casein                        | 20      | 20                 | 20                   |
| Dextrinized cornstarch        | 13.2    | 13.2               | 13.2                 |
| Sucrose                       | 10      | 10                 | 10                   |
| Soybean oil                   | 7       | 4.82               | 5                    |
| Sweet potato fiber            | 0       | 15                 | 0                    |
| Sweet potato residue          | 0       | 0                  | 15                   |
| L-Cystine                     | 0.3     | 0.3                | 0.3                  |
| Mineral mix                   | 1       | 1                  | 1                    |
| Vitamine mix                  | 3.5     | 3.5                | 3.5                  |
| Choline Chloride              | 0.246   | 0.246              | 0.246                |
| Antioxidants                  | 0.014   | 0.014              | 0.014                |
| Total                         | 100     | 100                | 100                  |
| Analysed chemical composition |         |                    |                      |
| Gross energy (Kcal/kg)        | 3766    | 3766               | 3766                 |
| Crude protein (%)             | 15.2    | 15.2               | 15.2                 |
| Soluable fiber (%)            | 3.7     | 15                 | 5.5                  |
| Insoluable fiber (%)          | 2.7     | 0.3                | 2.3                  |
| Total fiber (%)               | 6.4     | 15.3               | 7.8                  |

Table S2 Effects of sweet potato fiber and sweet potato residue supplementation on body weight gain and food intake of rats

| Treatment                          | Control                 | Sweet potato fiber      | Sweet potato residue    |
|------------------------------------|-------------------------|-------------------------|-------------------------|
| mean daily gain (g)                | 2.19±0.20 <sup>a</sup>  | 2.35±0.11 <sup>a</sup>  | 2.96±0.13 <sup>b</sup>  |
| mean daily food intake (g)         | 14.06±0.48 <sup>a</sup> | 13.48±0.38 <sup>a</sup> | 15.43±0.39 <sup>b</sup> |
| food intake/body weight gain ratio | 6.30±0.68               | 5.85±0.32               | 5.30±0.28               |

Data represent the means ± SEM. Different superscripts indicate significant difference ( $P < 0.05$ ).

Table S3 Data for plasma chemistry of rats administered with control, sweet potato fiber and sweet potato residue

| Parameters*                | Control                 | Sweet potato fiber      | Sweet potato residue    |
|----------------------------|-------------------------|-------------------------|-------------------------|
| ALB (g/L)                  | 33.39±0.36              | 34.55±0.80              | 33.90±0.49              |
| TP (g/L)                   | 75.24±0.70              | 70.76±1.23              | 72.42±1.23              |
| ALB/TP                     | 0.46±0.01 <sup>a</sup>  | 0.49±0.01 <sup>b</sup>  | 0.47±0.01 <sup>ab</sup> |
| ALT                        | 62.40±4.10              | 64.00±5.56              | 71.73±4.14              |
| AST                        | 269.90±13.11            | 255.00±21.29            | 281.55±13.20            |
| AST/ALT                    | 4.38±0.12               | 4.24±0.21               | 3.96±0.11               |
| BUN                        | 4.64±0.34 <sup>a</sup>  | 3.53±0.21 <sup>b</sup>  | 4.10±0.27 <sup>ab</sup> |
| CRE                        | 77.89±0.96 <sup>a</sup> | 69.40±1.29 <sup>b</sup> | 81.09±2.27 <sup>a</sup> |
| BUN/CRE                    | 0.06±0.00               | 0.05±0.00               | 0.06±0.00               |
| total cholesterol (mmol/L) | 2.11±0.15               | 2.22±0.11               | 2.35±0.09               |
| glucose (mmol/L)           | 3.86±0.45 <sup>ab</sup> | 4.92±0.50 <sup>b</sup>  | 3.22±0.37 <sup>a</sup>  |
| triglycerides (mmol/L)     | 1.14±0.10 <sup>a</sup>  | 0.85±0.08 <sup>b</sup>  | 0.83±0.04 <sup>b</sup>  |

\* ALB, albumin; TP, total protein; ALT, alanine transaminase; AST, aspartate transaminase; BUN, blood urea nitrogen; CRE, creatinine. Data represent the means ± SEM. Different superscripts indicate significant difference ( $P < 0.05$ ).
